# Supplementary material for: Comparing Traditional and Toxin-Oriented Approaches towards Antivenom Production against Bitis arietans Snake Venom
Source: MDPI journal article supplement (doi:10.3390/toxins15090584), 2023-09-20
Supplement: s1 [file s1]

# Comparing Traditional and Toxin-Oriented Approaches towards Antivenom Production against *Bitis arietans* Snake Venom

Felipe Raimondi Guidolin <sup>1,\*</sup>, Kemily Stephanie de Godoi <sup>1</sup>, Angela Alice Amadeu Megale <sup>1</sup>, Cristiane Castilho Fernandes da Silva <sup>2</sup>, Roberto Tadashi Kodama <sup>2</sup>, Daniela Cajado-Carvalho <sup>3</sup>, Leo Kei Iwai <sup>3</sup>, Patrick Jack Spencer <sup>4</sup>, Fernanda Calheta Vieira Portaro <sup>2</sup> and Wilmar Dias da Silva <sup>1,\*</sup>

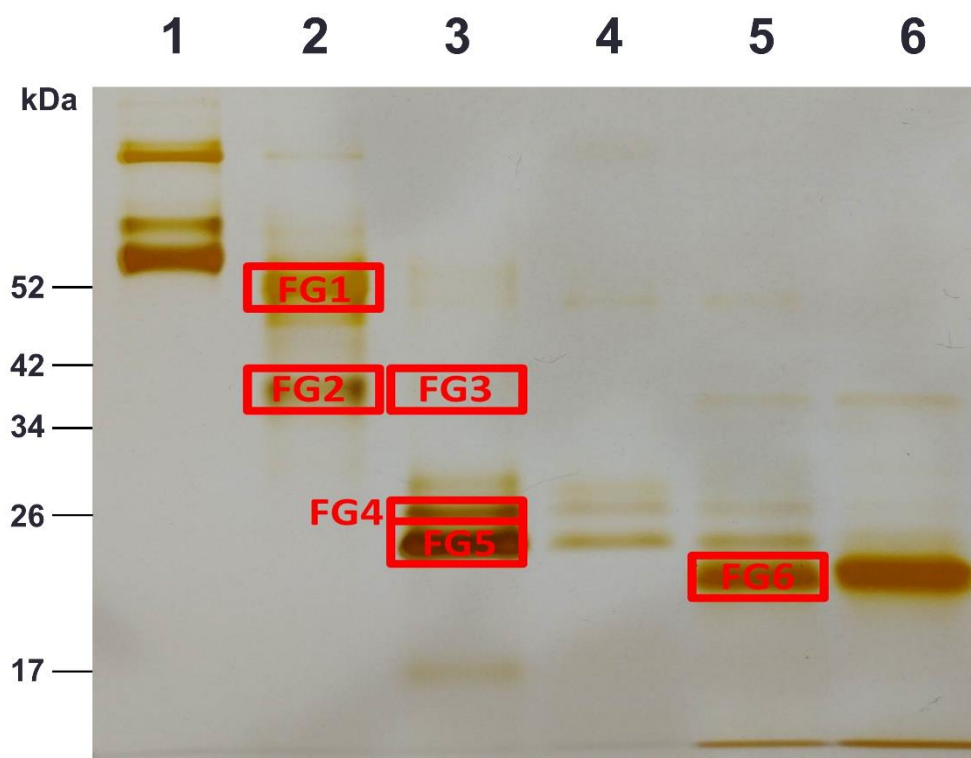

**Supplementary Figure S1.** Selection of protein bands from peaks 2, 3 and 5 from fractionating of *B. arietans* venom by size exclusion chromatography to protein identification on LC-MS/MS analysis. 5 µg of each peak were submitted to 12.5% SDS-PAGE, in non-reducing conditions. Selected bands (FG1 to FG6) were cut and submitted to in-gel trypsin digestion.

**Supplementary Table S1.** Identification of protein bands content by LC-MS/MS from fractions obtained from *B. arietans* venom after size exclusion chromatography.

| Sample | Score | Accession        | Description                     | OS                      |
|--------|-------|------------------|---------------------------------|-------------------------|
| FG1    | 78    | SLRB_BITHR       | Snaclec rhinocetin subunit beta | <i>Bitis rhinoceros</i> |
|        | 49    | A0A140DC05_BITAR | C-type lectin 1b                | <i>Bitis arietans</i>   |

|  |     |                  |                                                        |                                   |
|--|-----|------------------|--------------------------------------------------------|-----------------------------------|
|  | 50  | SLA_BITAR        | Snaclec bitiscetin subunit alpha                       | <i>Bitis arietans</i>             |
|  | 32  | A0A0B6VJU7_PROFL | Beta-actin                                             | <i>Probothrops flavoviridis</i>   |
|  | 32  | A0A0F7Z857_CROAD | Poly(a)-specific ribonuclease PARN                     | <i>Crotalus adamanteus</i>        |
|  | 28  | A0A1I9KNN4_VIPAA | Serine proteinase SP-3                                 | <i>Vipera ammodytes ammodytes</i> |
|  | 28  | A0A0F7Z8B1_CROAD | E3 ubiquitin-protein ligase                            | <i>Crotalus adamanteus</i>        |
|  | 18  | A0A6B2FD68_9SAUR | C-type lectin domain-containing protein                | <i>Bothriechis nubestris</i>      |
|  | 17  | A0A0K8RXM4_CROHD | Cyclin-dependent kinase 1-like                         | <i>Crotalus horridus</i>          |
|  | 131 | A0A194AM96_9SAUR | Serine proteinase 17                                   | <i>Agkistrodon piscivorus</i>     |
|  | 42  | A0A194APC3_9SAUR | Serine proteinase 14b                                  | <i>Agkistrodon piscivorus</i>     |
|  | 58  | A0A8A8C7M3_BOTJA | Thrombin-like enzyme                                   | <i>Bothrops jararaca</i>          |
|  | 56  | VSPY_MACLB       | Chymotrypsin-like protease VLCTLP                      | <i>Macrovipera lebetina</i>       |
|  | 66  | E9JG14_ECHCS     | Serine protease (fragment)                             | <i>Echis carinatus sochureki</i>  |
|  | 61  | D5KRX9_ECHOC     | Snake venom serine protease (fragment)                 | <i>Echis ocellatus</i>            |
|  | 116 | A0A6B7FPJ0_VIPAA | Serine proteinase SP-8                                 | <i>Vipera ammodytes ammodytes</i> |
|  | 81  | J3RZT5_CROAD     | Keratin, type I cytoskeletal 19                        | <i>Crotalus adamanteus</i>        |
|  | 58  | SLRB_BITRH       | Snaclec rhinocetin subunit beta                        | <i>Bitis rhinoceros</i>           |
|  | 50  | SLA_BITAR        | Snaclec bitiscetin subunit alpha                       | <i>Bitis arietans</i>             |
|  | 57  | A0A2H4Z2W1_DABSI | RVV-X heavy chain                                      | <i>Dabola siamensis</i>           |
|  | 52  | A0A0F7ZB82_CROAD | Ankyrin repeat and BTB/POZ domain-containing protein 2 | <i>Crotalus adamanteus</i>        |
|  | 48  | A0A1I9KNL5_VIPAA | Serine proteinase SP-2                                 | <i>Vipera ammodytes ammodytes</i> |

|     |    |                  |                                                   |                                          |
|-----|----|------------------|---------------------------------------------------|------------------------------------------|
| FG2 | 45 | A0A0B8RV71_CROHD | Keratin, type II cytoskeletal cochleal-like       | <i>Crotalus horridus</i>                 |
|     | 44 | OXLA_DABRR       | L-amino-acid oxidase                              | <i>Daboia russelii</i>                   |
|     | 43 | A0A0F7ZAB1_CROAD | Keratin, type I cytoskeletal 18-like protein      | <i>Crotalus adamanteus</i>               |
|     | 36 | A0A1W7RD94_AGKCO | Sister chromatid cohesion protein PDS5            | <i>Agkistrodon contortrix contortrix</i> |
|     | 34 | A0A0F7ZBJ1_CROAD | FAS-associated factor 1                           | <i>Crotalus adamanteus</i>               |
|     | 33 | A0A1W7REY6_AGKCO | Sister chromatid cohesion protein PDS5 B          | <i>Agkistrodon contortrix contortrix</i> |
|     | 33 | A0A0F7Z8R3_CROAD | Interferon-inducible GTPase 5-like                | <i>Crotalus adamanteus</i>               |
|     | 32 | A0A0F7Z8B1_CROAD | E3 ubiquitin-protein ligase                       | <i>Crotalus adamanteus</i>               |
|     | 29 | A0A194APM7_9SAUR | C-type lectin 9d                                  | <i>Agkistrodon piscivorus</i>            |
|     | 28 | A0A0F7ZEI3_CROAD | Protein c20orf29                                  | <i>Crotalus adamanteus</i>               |
|     | 27 | A0A0F7Z857_CROAD | Poly(A)-specific ribonuclease PARN                | <i>Crotalus adamanteus</i>               |
|     | 26 | A0A0F7ZE88_CROAD | Dermatan-sulfate epimerase                        | <i>Crotalus adamanteus</i>               |
|     | 26 | A0A1W7RF54_AGKCO | NudC domain-containing protein 2                  | <i>Agkistrodon contortrix contortrix</i> |
|     | 25 | A0A0F7Z7G6_CROAD | PAT1 1-like protein                               | <i>Crotalus adamanteus</i>               |
|     | 23 | J3SFD0_CROAD     | SURF1-like protein                                | <i>Crotalus adamanteus</i>               |
|     | 20 | A0A0F7Z8B2_CROAD | Exosome component 10 isoform 1                    | <i>Crotalus adamanteus</i>               |
|     | 19 | A0A0F7Z5N5_CROAD | Polycomb protein SCMH1 isoform X2                 | <i>Crotalus adamanteus</i>               |
|     | 19 | A0A0F7ZCD4_CROAD | Oxidation resistance protein 1 isoform X3         | <i>Crotalus adamanteus</i>               |
|     | 19 | A0A0F7Z415_CROAD | Serine/threonine-protein kinase TBK1-like protein | <i>Crotalus adamanteus</i>               |
|     | 18 | A0A0F7ZEN3_CROAD | Ankyrin repeat domain-containing protein 12-like  | <i>Crotalus adamanteus</i>               |

|     |    |                  |                                                                             |                                                    |
|-----|----|------------------|-----------------------------------------------------------------------------|----------------------------------------------------|
|     | 16 | A0A0F7Z988_CROAD | Creatine kinase                                                             | <i>Crotalus adamanteus</i>                         |
|     | 16 | A0A1W7RHL5_AGKCO | Endoplasmic reticulum-Golgi intermediate compartment protein 2-like protein | <i>Agkistrodon contortrix</i><br><i>contortrix</i> |
|     | 14 | A0A0F7Z6K8_CROAD | Dynamin_N domain-containing protein                                         | <i>Crotalus adamanteus</i>                         |
|     | 13 | T1E5M6_CROHD     | Acetyl-CoA C_myristoyltransferase                                           | <i>Crotalus horridus</i>                           |
| FG3 | 73 | VSPC_TRIGA       | Snake venom serine protease 2C                                              | <i>Trimeresurus gramineus</i>                      |
|     | 68 | J3RZT5_CROAD     | Keratin, type I cytoskeletal 19                                             | <i>Crotalus adamanteus</i>                         |
|     | 61 | A0A194AM96_9SAUR | Serine proteinase 17                                                        | <i>Agkistrodon piscivorus</i>                      |
|     | 54 | D5KRX9_ECHOC     | Snake venom serine protease (fragment)                                      | <i>Echis ocellatus</i>                             |
|     | 52 | D8MIA2_BITRH     | Snake venom serine protease (fragment)                                      | <i>Bitis rhinoceros</i>                            |
|     | 47 | A0A6B7FPJ0_VIPAA | Serine proteinase SP-8                                                      | <i>Vipera ammodytes</i><br><i>ammodytes</i>        |
|     | 42 | A0A194APM7_SAUR  | C-type lectin 9d                                                            | <i>Agkistrodon piscivorus</i>                      |
|     | 33 | A0A0F7ZAB1_CROAD | Keratin, type I cytoskeletal 18-like protein                                | <i>Crotalus adamanteus</i>                         |
|     | 29 | A0A5A4WNG2_BITAR | Bitiscetin-3 subunit alpha                                                  | <i>Bitis arietans</i>                              |
|     | 24 | A0A1W7RC08_AGKCO | Ubiquitin-like conjugating enzyme ATG3-like protein                         | <i>Agkistrodon contortrix</i><br><i>contortrix</i> |
|     | 23 | A0A0K8S0L2_CROHD | Iron-sulfur cluster assembly 1, mitochondrial-like protein                  | <i>Crotalus horridus</i>                           |
|     | 23 | A0A0F7Z8B1_CROAD | E3 ubiquitin-protein ligase                                                 | <i>Crotalus adamanteus</i>                         |
|     | 22 | A0A0F7ZEI3_CROAD | Protein C20orf29                                                            | <i>Crotalus adamanteus</i>                         |
|     | 22 | A0A0F7Z7A4_CROAD | Protein phosphatase 1 regulatory subunit 12B-like                           | <i>Crotalus adamanteus</i>                         |
|     | 22 | A0A1W7RF54_AGKCO | NudC domain-containing protein 2                                            | <i>Agkistrodon contortrix</i><br><i>contortrix</i> |

|     |    |                  |                                                     |                                   |
|-----|----|------------------|-----------------------------------------------------|-----------------------------------|
|     | 21 | A0A0F7ZBJ1_CROAD | FAS-associated factor 1                             | <i>Crotalus adamanteus</i>        |
|     | 21 | A0A0F7Z958_CROAD | Guanine nucleotide-binding protein subunit alpha-11 | <i>Crotalus adamanteus</i>        |
|     | 20 | A0A0K8RWZ3_CROHD | Proteasome-associated protein ECM29-like            | <i>Crotalus horridus</i>          |
|     | 19 | A0A0F7Z3D0_CROAD | Ubiquitin C                                         | <i>Crotalus adamanteus</i>        |
|     | 19 | A0A0F7Z434_CROAD | RAD21-like protein                                  | <i>Crotalus adamanteus</i>        |
|     | 19 | A0A2H4Z2W1_DABSI | RVV-X heavy chain                                   | <i>Daboia siamensis</i>           |
|     | 18 | A0A6B2FB67_BOTNI | U6 snRNA-associated Sm-like protein LSm8            | <i>Bothriechis nigroviridis</i>   |
| FG4 | 37 | I7JA31_BITRH     | C-type lectin-like protein 4                        | <i>Bitis rhinoceros</i>           |
|     | 33 | A0A0C5DKL1_MACLB | C-type lectin-like protein 3A                       | <i>Macrovipera lebetina</i>       |
|     | 33 | A0A140DC06_BITAR | C-type lectin 2                                     | <i>Bitis arietans</i>             |
|     | 33 | A0A1B3AXS3_BITAR | C-type lectin-like protein                          | <i>Bitis arietans</i>             |
|     | 33 | A0A6B7FMP6_VIPAA | C-type lectin-like Snaclec-9                        | <i>Vipera ammodytes ammodytes</i> |
|     | 33 | SLAE_MACLB       | Snaclec A-14                                        | <i>Macrovipera lebetina</i>       |
|     | 33 | SLAF_MACLB       | Snaclec a15                                         | <i>Macrovipera lebetina</i>       |
|     | 33 | SLA_DABPA        | Snaclec VP12                                        | <i>Daboia palaestinae</i>         |
|     | 33 | SLA2_BITGA       | Snaclec 2                                           | <i>Bitis gabonica</i>             |
|     | 33 | I7JX23_BITRH     | C-type lectin-like protein 3                        | <i>Bitis rhinoceros</i>           |
|     | 33 | K9JBV0_DABSI     | P68 alpha subunit                                   | <i>Daboia siamensis</i>           |
|     | 33 | K9JDF2_DABRR     | P68 alpha subunit                                   | <i>Daboia russelii limitis</i>    |
|     | 27 | A0A0C5DKK6_MACLB | C-type lectin-like protein 2A                       | <i>Macrovipera lebetina</i>       |
|     | 27 | SLMA_MACLB       | Snaclec macrovipectin subunit alpha                 | <i>Macrovipera lebetina</i>       |

|     |    |                  |                                                                    |                                          |
|-----|----|------------------|--------------------------------------------------------------------|------------------------------------------|
| FG5 | 54 | SLA_BITAR        | Snaclec bitiscetin subunit alpha                                   | <i>Bitis arietans</i>                    |
|     | 52 | SLB6_MACLB       | Snaclec B6 (fragment)                                              | <i>Macrovipera lebetina</i>              |
|     | 49 | A0A0C5DKL1_MACLB | C-type lectin-like protein 3A                                      | <i>Macrovipera lebetina</i>              |
|     | 46 | J3RZT5_CROAD     | Keratin, type I cytoskeletal 19                                    | <i>Crotalus adamanteus</i>               |
|     | 40 | A0A1W7RE48_AGKCO | Ribonuclease P protein subunit p38-like protein                    | <i>Agkistrodon contortrix contortrix</i> |
|     | 38 | A0A0B8RV71_CROHD | Keratin, type II cytoskeletal cochlear-like                        | <i>Crotalus horridus</i>                 |
|     | 34 | A0A0F7ZAB1_CROAD | Keratin, type I cytoskeletal 18-like protein                       | <i>Crotalus adamanteus</i>               |
|     | 31 | A0A0F7Z805_CROAD | MBT domain-containing protein 1 isoform                            | <i>Crotalus adamanteus</i>               |
|     | 29 | SLB1_MACLB       | Snaclec B1                                                         | <i>Macrovipera lebetina</i>              |
|     | 29 | A0A0F7Z8B1_CROAD | E3 ubiquitin-protein ligase                                        | <i>Crotalus adamanteus</i>               |
|     | 29 | A0A194APM7_9SAUR | C-type lectin 9d                                                   | <i>Agkistrodon piscivorus</i>            |
|     | 28 | A0A1W7RD94_AGKCO | Sister chromatid cohesion protein PDS5                             | <i>Agkistrodon contortrix contortrix</i> |
|     | 26 | A0A1W7REY6_AGKCO | Sister chromatid cohesion protein PDS5 B                           | <i>Agkistrodon contortrix contortrix</i> |
|     | 26 | SL114_ECHCA      | Snaclec carinactivase-1 regulatory subunit 14 kDa chain (fragment) | <i>Echis carinatus</i>                   |
|     | 25 | A0A0C5DKK6_MACBL | C-type lectin-like protein 2A                                      | <i>Macrovipera lebetina</i>              |
|     | 24 | A0A1W7RC08_AGKCO | Ubiquitin-like-conjugating enzyme ATG3-like protein                | <i>Agkistrodon contortrix contortrix</i> |
|     | 23 | A0A0F7Z6K1_CROAD | Phosphatidate phosphatase                                          | <i>Crotalus adamanteus</i>               |
|     | 22 | A0A0K8S0L2_CROHD | Iron-sulfur cluster assembly 1, mitochondrial-like protein         | <i>Crotalus horridus</i>                 |
|     | 20 | A0A0F7ZC99_CROAD | Charged multivesicular body protein                                | <i>Crotalus adamanteus</i>               |

|     |    |                  |                                                                             |                                                              |
|-----|----|------------------|-----------------------------------------------------------------------------|--------------------------------------------------------------|
|     | 18 | A0A1W7RDB4_AGKCO | Sialic acid synthase-like protein                                           | <i>Agkistrodon</i><br><i>contortrix</i><br><i>contortrix</i> |
|     | 17 | A0A1W7RF54_AGKCO | NudC domain-containing protein 2                                            | <i>Agkistrodon</i><br><i>contortrix</i><br><i>contortrix</i> |
|     | 16 | A0A1W7RHL5_AGKCO | Endoplasmic reticulum-Golgi intermediate compartment protein-2 like protein | <i>Agkistrodon</i><br><i>contortrix</i><br><i>contortrix</i> |
|     | 15 | T1E4Y0_CROHD     | Secernin-3-like protein                                                     | <i>Crotalus horridus</i>                                     |
|     | 15 | A0A0B8RW51_CROHD | Cytochrome P450 2j5-like protein                                            | <i>Crotalus horridus</i>                                     |
|     | 15 | A0A0K8RXU5_CROHD | Tubulin-glutamate carboxypeptidase                                          | <i>Crotalus horridus</i>                                     |
|     | 13 | A0A194AQ76_SISMB | C-type lectin 15                                                            | <i>Sistrurus</i><br><i>miliarius</i><br><i>barbouri</i>      |
| FG6 | 54 | J3RZT5_CROAD     | Keratin, type I cytoskeletal 19                                             | <i>Crotalus</i><br><i>adamanteus</i>                         |
|     | 52 | A0A194APM7_9SAUR | C-type lectin 9d                                                            | <i>Agkistrodon</i><br><i>piscivorus</i>                      |
|     | 49 | A0A0B8RV71_CROHD | Keratin, type II cytoskeletal cochleal-like                                 | <i>Crotalus horridus</i>                                     |
|     | 35 | A0A1W7REY6_AGKCO | Sister chromatid cohesion protein PDS5 B                                    | <i>Agkistrodon</i><br><i>contortrix</i><br><i>contortrix</i> |
|     | 32 | A0A0F72BJ1_CROAD | FAS-associated factor 1                                                     | <i>Crotalus</i><br><i>adamanteus</i>                         |
|     | 30 | A0A0F7ZAB1_CROAD | Keratin, type I cytoskeletal 18-like protein                                | <i>Crotalus</i><br><i>adamanteus</i>                         |
|     | 29 | VM2_BITAR        | Disintegrin bitistatin                                                      | <i>Bitis arietans</i>                                        |

FG1 to FG6 were cut from the gel and subjected to in-gel digestion with trypsin. Analysis was performed using an Easy-nLC Proxeon nanoHPLC system coupled to an LTQ-Orbitrap Velos. The results obtained were compared with the “*Bitis*” and “*Snakes*” database downloaded from Uniprot (Taxid: 8570).
